# Supplementary material
Source: HighWire-hosted journal article supplement (https://lupus.bmj.com/content/11/1/e001036)
Supplement: inline-supplementary-material-1 [file inline-supplementary-material-1.pdf]

## Azathioprine Metabolite Levels and Outcomes During Pregnancies in Women with Rheumatic Disease

### Supplemental Materials

**Supplemental Figure S1** Ratio of 6-MMPN to 6-TGN throughout pregnancy and peripartum.

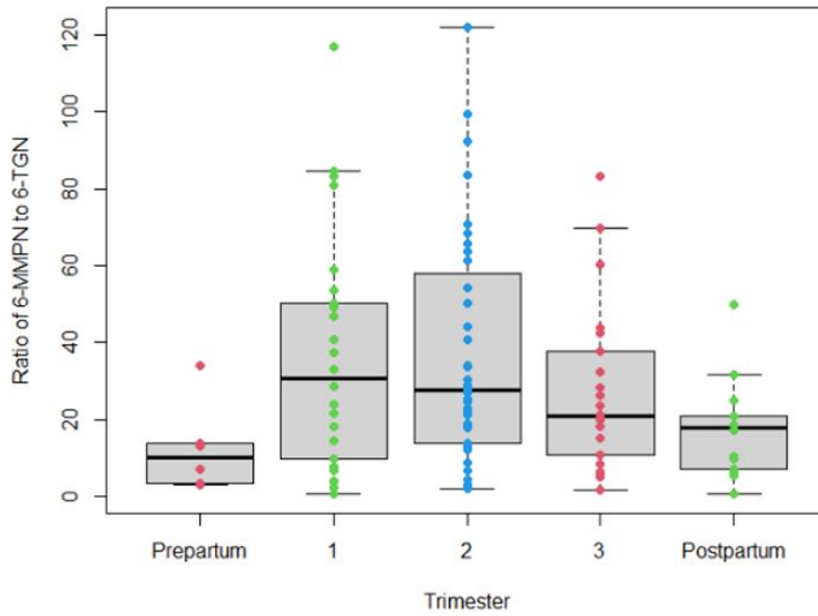

**Supplemental Figure S2** Dose-adjusted 6-TGN and TPMT phenotype.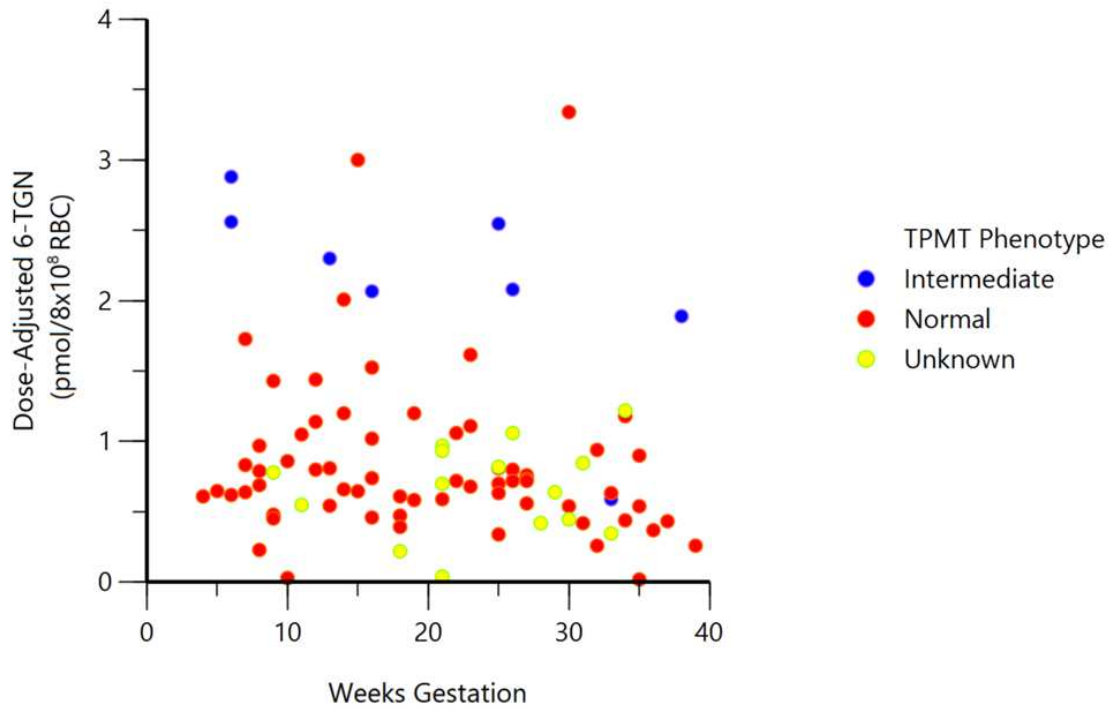

**Supplemental Figure S3** Individual trajectories of AZA metabolite levels in patients without dose changes. Trimester 0 represents pre-pregnancy and Trimester 4 represents postpartum.

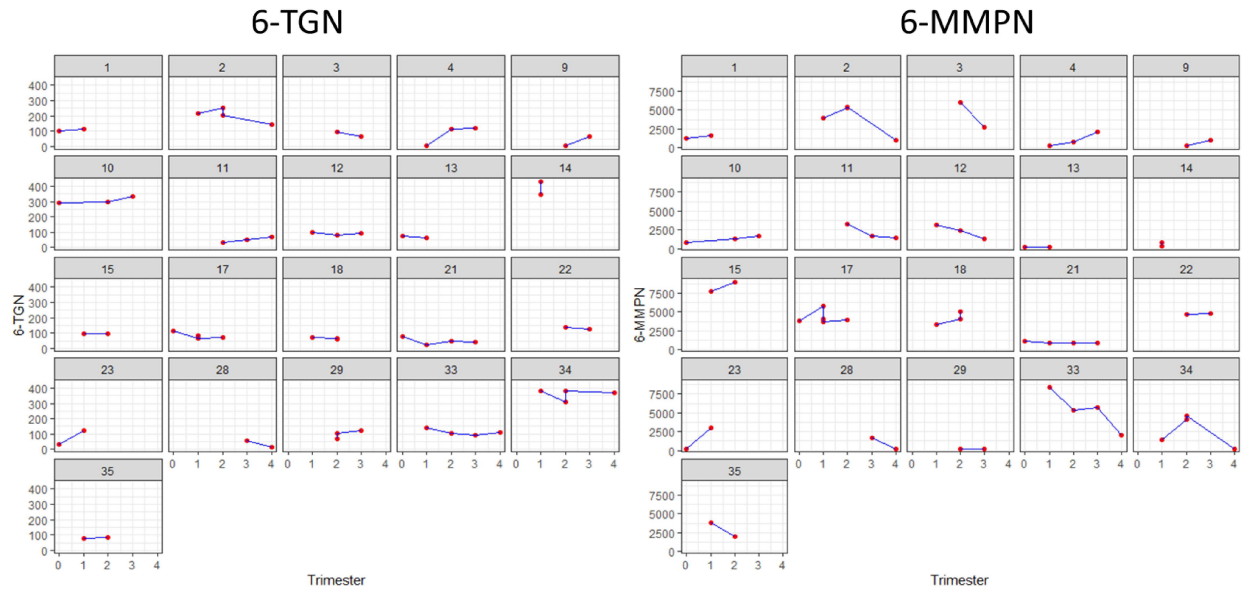

**Supplemental Figure S4** SLE Physician Global Assessment and 6-TGN therapeutic category.

Grey area represents the interquartile range whereas the solid black line represents the median.

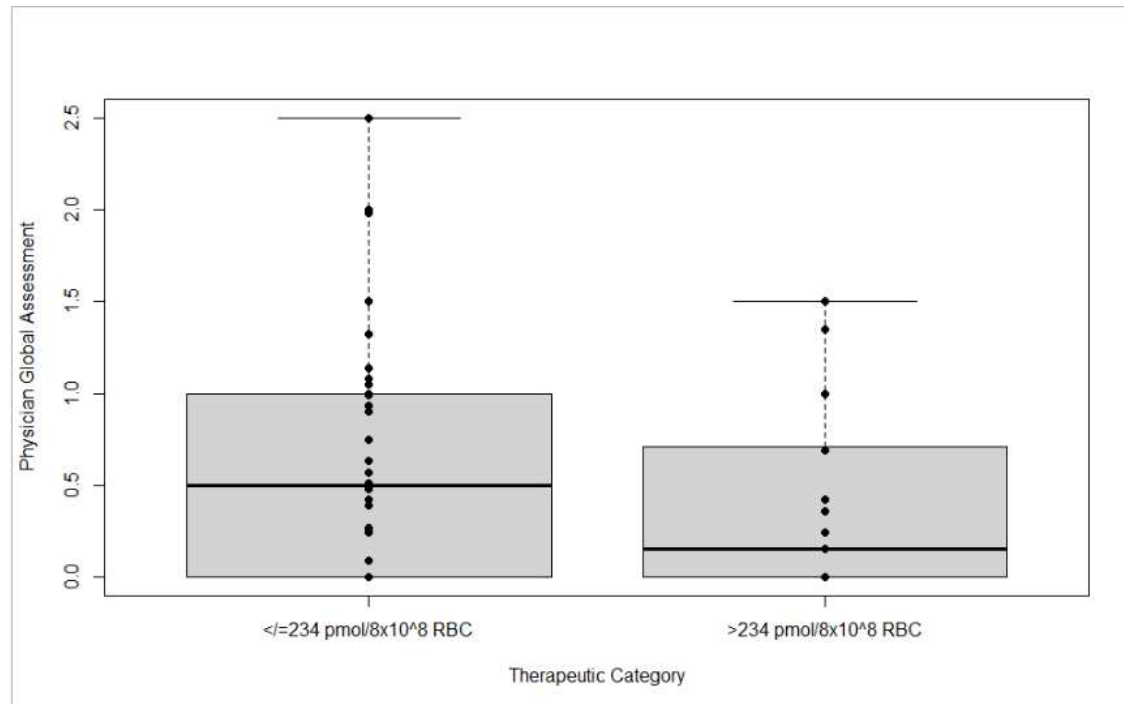

**Supplemental Table 1:** Dose changes in patients with elevated 6-MMPN.

| Patient Number | 6-MMPN pmol/8X10 <sup>8</sup> RBC | Medication Change                                                    |
|----------------|-----------------------------------|----------------------------------------------------------------------|
| 1              | 6062                              | 150 mg (1.9 mg/kg) -> No change                                      |
| 2              | 6022                              | 150 mg (2.1 mg/kg) -> No change                                      |
| 2              | 5929                              | 150 mg (2.1 mg/kg) -> 100 mg (1.4 mg/kg)                             |
| 3              | 8308                              | Discontinue AZA 150 mg (1.2 mg/kg), start mycophenolate (postpartum) |
| 4              | 7767                              | 150 mg (2.3 mg/kg) -> No change                                      |
| 4              | 8955                              | 150 mg (2.1 mg/kg) -> 100 mg (1.4 mg/kg)                             |
| 5              | 12859                             | 200 mg (1.8 mg/kg) -> 50 mg (0.5 mg/kg)                              |
| 6              | 5758                              | 150 mg (1.9 mg/kg) -> 125 mg (1.6 mg/kg)                             |
| 7              | 7483                              | 175 mg (2.3 mg/kg) -> No change                                      |
| 7              | 9303                              | 175 mg (2.3 mg/kg) -> 150 mg (1.8 mg/kg)                             |
| 8              | 7908                              | 150 mg (1.6 mg/kg) -> 100 mg (1.1 mg/kg)                             |
| 9              | 8433                              | 100 mg (2.1 mg/kg) -> No change                                      |
| 10             | 13184                             | 150 mg (1.5 mg/kg) -> 100 mg -> 50 mg (0.5 mg/kg)                    |
